# Supplementary material
Source: HighWire-hosted journal article supplement (https://ijgc.bmj.com/content/29/1/60)
Supplement: inline-supplementary-material-1 [file inline-supplementary-material-1.docx]

**Supplementary Material 1. Template of the questionnaire “Survey on Sentinel Lymph Node for Endometrial Cancer: A Mayo Clinic International Project”.**

Q1 SENTINEL LYMPH NODE (SLN) TECHNIQUE FOR ENDOMETRIAL CANCER STAGING

Q2 Are you a:

- Gynecologic Oncologist (1)
- Radiation Oncologist (2)
- Medical Oncologist (3)
- Other (4)

Q3 What is your position?

- Attending Physician/Consultant (1)
- Resident (2)
- Fellow (3)
- Retired Member (4)

Q4 How many years has it been since you completed your training?

- Less than 3 years (1)
- 3 to 10 years (2)
- More than 10 years (3)

Q5 What country are you from?

Q6 What type of institution do you practice in?

- Academic Center (1)
- Non-Academic Center (2)
- Other, please specify: (3) ____________________

Q7 What is the number of endometrial cancers treated at your institution per year?

- Less than 10 per year (1)
- 10 to 20 per year (2)
- 21 to 50 per year (3)
- 51 to 100 per year (4)
- 101 to 200 per year (5)
- More than 200 per year (6)

Q8 Is laparoscopic surgery available at your institution?

- Yes (1)
- No (2)

Q9 Is robotic surgery available at your institution?

- Yes (1)
- No (2)

Q10 Is minimally invasive surgery (laparoscopy and/or robotic surgery) the approach of choice for the treatment of apparent early stage endometrial cancer at your institution?

- Yes (1)
- No (2)

Q11 Is a frozen section commonly used (more than 50% of the cases) to assess uterine risk factors intraoperatively at your institution?

- Yes (1)
- No (2)

Q12 Do you use SLN technique for Endometrial Cancer Staging?

- Yes (1)
- No (2)

Q13 Which tracer is commonly injected?

- ICG (Indocyanine Green) (1)
- Blue Dye (2)
- Both tracers (ICG and Blue Dye) (3)
- Tc99 (4)
- Tc99 in combination with other tracer (5)
- Other, please specify: (6) ____________________

Q14 Where is the tracer commonly injected?

- Cervix (1)
- Uterine body (2)
- Cervix and uterine body (3)
- Other, please specify: (4) ____________________

Q15 Regarding the uterine injection, please specify the option(s) that best apply.  (Mark all that apply.)

- Submucosal (1)
- Intramuscular (2)
- Subserosal (3)

Q16 Do you apply NCCN (National Comprehensive Cancer Network) SLN Algorithm?

- Yes (1)
- No (2)
- Not aware of NCCN SLN Algorithm (3)

Q17 Is a routine backup lymphadenectomy performed after having the SLN(s) removed?

- Yes, in all cases (1)
- Only in high risk cases (2)
- Not performed ever (3)

Q18 Is frozen section performed in the SLN(s) removed?

- Yes (1)
- No (2)

Q19 Which procedure would you perform if the frozen section reveals positive SLN(s)?

- No other surgical procedure (1)
- Complete pelvic lymphadenectomy (2)
- Complete pelvic and para-aortic lymphadenectomy (3)
- Other, please specify: (4) ____________________

Q20 If SLN is not detected, which procedure would you perform?

- Side specific lymphadenectomy (1)
- Selected pelvic lymphadenectomy according to risk factors (2)
- Pelvic and para-aortic lymphadenectomy according to risk factors (3)
- Always pelvic and para-aortic lymphadenectomy (4)
- No other procedure (5)

Q21 Do you perform ultrastaging of the SLN removed?

- Yes (1)
- No (2)

Q22 Management of adjuvant treatment in case of positive SLN with Macrometastasis/Micrometastasis/Isolated Tumor Cells (ITCs)

Q23 Do you suggest adjuvant treatment if SLN(s) removed reveals macrometastasis?

- Yes, always (1)
- Based on risk factors (2)
- Never (3)

Q24 If yes, what type of adjuvant treatment do you use?

- Chemotherapy alone (1)
- Radiation therapy alone (2)
- Chemotherapy and radiation therapy (3)
- Other, please specify: (4) ____________________

Q25 Do you suggest adjuvant treatment if SLN(s) removed reveals micrometastasis?

- Yes, always (1)
- Based on risk factors (2)
- Never (3)

Q26 If yes, what type of adjuvant treatment do you use?

- Chemotherapy alone (1)
- Radiation therapy alone (2)
- Chemotherapy and radiation therapy (3)
- Other, please specify: (4) ____________________

Q27 Do you suggest adjuvant treatment if SLN(s) removed reveals isolated tumor cells (ITC)?

- Yes, always (1)
- Based on risk factors (2)
- Never (3)

Q28 If yes, what type of adjuvant treatment do you use?

- Chemotherapy alone (1)
- Radiation therapy alone (2)
- Chemotherapy and radiation therapy (3)
- Other, please specify: (4) ____________________

Q29 What is the primary reason(s) you do not perform SLN technique?  (Mark all that apply.)

- Not enough evidence (1)
- Lack in instrumentations (2)
- Costs (3)
- Other, please specify: (4) ____________________

Q30 What is your standard practice for Endometrial Cancer Staging?

- No lymph node staging (1)
- Selective pelvic (only) lymphadenectomy (according to risk factors) (2)
- Systematic pelvic (only) lymphadenectomy (3)
- Selective (pelvic/para-aortic) lymphadenectomy (according to risk factors) (4)
- Systematic (pelvic and para-aortic) lymphadenectomy (5)
- Other, please specify: (6) ____________________

Q31 Specify the anatomic extent of the para-aortic lymphadenectomy?

- Up to IMA (inferior mesenteric artery) (1)
- Up to the renal veins (2)
- Other, please specify: (3) ____________________
